# Supplementary material for: Modified posterior sagittal anorectoplasty (mPSARP) versus transfistula anorectoplasty (TFARP) for anorectal malformation with rectovestibular fistula (RVF): a retrospective study of surgical outcomes and the impact of preoperative pelvic muscle development
Source: Research Square preprint supplement (doi:10.21203/rs.3.rs-8579886/v1), 2026-01-20
Supplement: Supplementary file 1 [file 6313ebf491fa477e519b39db.docx]

Table S1 The status of other systemic malformations associated with rectal vestibular fistula in children

| Associated anomalies | mPSARP | TFARP |
| --- | --- | --- |
| Patent foramen ovale | 7 | 0 |
| Atrial septal defect | 8 | 1 |
| Dextrocardia | 1 | 0 |
| Membranous ventricular septal aneurysm | 1 | 0 |
| Ventricular septal defect | 3 | 0 |
| Double outlet right ventricle | 1 | 0 |
| Hypoplastic left heart syndrome | 1 | 0 |
| Patent ductus arteriosus | 1 | 0 |
| Thoracic meningocele | 1 | 0 |
| Tethered cord syndrome | 6 | 0 |
| Dilatation of the central canal of the spinal cord | 2 | 0 |
| Syringomyelia | 1 | 0 |
| Pilonidal cyst | 1 | 0 |
| Intraspinal mass | 3 | 0 |
| Duplex kidney | 1 | 0 |
| Renal agenesis | 0 | 1 |
| Congenital vaginal atresia | 1 | 0 |
| Renal pelvic separation | 2 | 2 |
| Turner syndrome | 1 | 0 |
| Ectopic kidney | 1 | 0 |
| Horseshoe kidney | 1 | 0 |
| Y-shaped ureter | 1 | 0 |
| Congenital limb deficiency (absence of right thumb) | 1 | 0 |
| Scoliosis | 1 | 1 |
| Lumbar vertebral malformation | 1 | 0 |
| Sacral malformation | 3 | 0 |
| Esophageal atresia with tracheoesophageal fistula | 1 | 0 |
| Annular pancreas | 1 | 0 |
| Duodenal web | 1 | 0 |
| Perineal lipoma | 1 | 0 |
| Perineal hemangioma | 1 | 0 |

Table S2 Kelly Score

| Assessment Item | Description | Score |
| --- | --- | --- |
| Frequency of staining of smearing | None | 2 |
|  | Occasional | 1 |
|  | Constant | 0 |
| Occurrence of accidental defecation or soiling | None | 2 |
|  | Occasional | 1 |
|  | Constant | 0 |
| Strength of puborectalis muscle action on digital examination | Strong squeeze | 2 |
|  | Weak squeeze | 1 |
|  | No squeeze | 0 |

Table S3 Functional outcomes of anorectal malformation patients following definitive surgery according to Krickenbeck classification

| Functional Outcome | Yes/No | Description |
| --- | --- | --- |
| Voluntary Bowel Movement |  |  |
|  | Yes | • Sensation of defecation |
|  |  | • Ability to express intention |
|  |  | • Ability to control defecation |
|  | No |  |
| Soiling |  |  |
|  | Yes | • Grade 1: Occasional (1–2 times/week) |
|  |  | • Grade 2: Daily, does not affect daily life |
|  |  | • Grade 3: Constant, affects daily life |
|  | No |  |
| Constipation |  |  |
|  | Yes | • Grade 1: Manageable with dietary modifications |
|  |  | • Grade 2: Requires laxatives |
|  |  | • Grade 3: Requires enema |
|  | No |  |
